# Supplementary material
Source: publisher site journal article supplement (https://www.dovepress.com/article/410971)
Supplement: Supplementary file 1 [file get_supplementary_file.php]

**Supplementary Table 1.** Prevalence in the survey and CRHC with positive and negative percent agreement and kappa values separately for proxy- and self-respondents among all participants with non-missing information on proxy status (n=1,529)

|  | **Survey** | **CRHC** | | |  |
| --- | --- | --- | --- | --- | --- |
|  | % (n) | % (n) | PPA | NPA | ĸ |
| *Self-respondents (n=1,244)* |  |  |  |  |  |
| Osteoarthritis | 46.0 (572) | 25.5 (317) | 67.2 | 61.3 | .23 |
| Depression | 15.1 (188) | 4.7 (59) | 57.6 | 87.0 | .22 |
| Hypertension | 62.0 (771) | 43.5 (541) | 52.9 | 81.3 | .33 |
| Heart disease | 53.9 (671) | 51.0 (635) | 80.6 | 73.9 | .55 |
| Cancer | 16.8 (209) | 25.2 (313) | 54.6 | 95.9 | .57 |
| Dementia | 32.2 (401) | 17.0 (211) | 89.6 | 79.5 | .51 |
| Stroke | 8.5 (106) | 13.0 (162) | 51.9 | 98.0 | .58 |
| Parkinson's disease | 1.4 (17) | 0.5 (6) | 100 | 99.1 | .52 |
| Diabetes | 15.0 (187) | 9.9 (123) | 81.3 | 92.2 | .60 |
| Hip fracture | 16.6 (207) | 11.7 (146) | 82.9 | 92.2 | .64 |
| *Proxy respondents (n=285)* |  |  |  |  |  |
| Osteoarthritis | 36.8 (105) | 23.2 (66) | 47.0 | 66.2 | .11 |
| Depression | 26.3 (75) | 9.5 (27) | 66.7 | 77.9 | .25 |
| Hypertension | 56.8 (162) | 47.0 (134) | 77.6 | 61.6 | .39 |
| Heart disease | 51.9 (148) | 52.6 (150) | 70.7 | 68.9 | .40 |
| Cancer | 15.1 (43) | 23.5 (67) | 53.7 | 96.8 | .58 |
| Dementia | 86.3 (246) | 64.6 (184) | 97.3 | 33.7 | .36 |
| Stroke | 11.2 (32) | 20.7 (59) | 50.8 | 99.1 | .60 |
| Parkinson's disease | 2.5 (7) | 2.1 (6) | 83.3 | 99.3 | .76 |
| Diabetes | 16.5 (47) | 12.3 (35) | 91.4 | 94.0 | .75 |
| Hip fracture | 20.4 (58) | 19.3 (55) | 76.4 | 93.0 | .68 |

**Abbreviations:** CRHC, Care Register for Health Care; PPA, positive percent agreement; NPA, negative percent agreement

**Notes:** ĸ = Kappa coefficient

**Supplementary Table 2.** Prevalence in the survey, CRHC, FPR, and both registers combined with PPA, NPA, and kappa values separately for proxy- and self-respondents among respondents with information from FPR and non-missing data on proxy status (n=1,092)

|  | | | | | | | | | | | | |  |
| --- | --- | --- | --- | --- | --- | --- | --- | --- | --- | --- | --- | --- | --- |
|  | Survey | CRHC | | |  | FPR | | |  | Both registers | | |  |
|  | % (n) | % (n) | PPA | NPA | ĸ | % (n) | PPA | NPA | ĸ | % (n) | PPA | NPA | ĸ |
| *Self-respondents (n=823)* |  |  |  |  |  |  |  |  |  |  |  |  |  |
| Hypertension | 58.6 (482) | 47.9 (394) | 77.9 | 59.2 | 0.37 | 35.2 (290) | 90.0 | 58.5 | 0.42 | 58.6 (482) | 79.7 | 71.3 | 0.51 |
| Heart disease | 57.8 (476) | 57.2 (471) | 79.4 | 71.0 | 0.51 | 23.0 (189) | 89.4 | 51.6 | 0.27 | 60.8 (500) | 79.6 | 75.9 | 0.55 |
| Dementia | 38.2 (314) | 22.5 (185) | 90.8 | 77.1 | 0.54 | 15.1 (124) | 96.0 | 72.1 | 0.42 | 25.8 (212) | 92.0 | 80.5 | 0.63 |
| Diabetes | 14.6 (120) | 11.5 (95) | 77.9 | 93.7 | 0.64 | 7.5 (62) | 96.8 | 92.1 | 0.87 | 12.8 (105) | 80.0 | 95.0 | 0.71 |
| Parkinson's disease | 1.3 (11) | 0.6 (5) | 100 | 99.3 | 0.62 | 0.9 (7) | 100 | 99.5 | 0.78 | 1.0 (8) | 100 | 99.6 | 0.84 |
| *Proxy respondents (n=269)* |  |  |  |  |  |  |  |  |  |  |  |  |  |
| Hypertension | 57.6 (155) | 47.6 (128) | 78.1 | 60.7 | 0.39 | 32.7 (88) | 88.6 | 57.2 | 0.38 | 55.8 (150) | 81.3 | 72.0 | 0.54 |
| Heart disease | 52.0 (140) | 53.2 (143) | 69.9 | 68.0 | 0.38 | 16.0 (43) | 90.7 | 55.1 | 0.24 | 56.9 (153) | 69.9 | 71.3 | 0.41 |
| Dementia | 87.0 (234) | 66.2 (178) | 97.2 | 33.0 | 0.35 | 35.7 (96) | 97.9 | 19.1 | 0.13 | 72.1 (194) | 97.4 | 40.0 | 0.45 |
| Diabetes | 16.0 (43) | 12.3 (33) | 90.9 | 94.5 | 0.76 | 7.8 (21) | 100 | 91.1 | 0.62 | 14.5 (39) | 92.3 | 96.9 | 0.86 |
| Parkinson's disease | 2.6 (7) | 2.2 (6) | 83.3 | 99.2 | 0.76 | 1.5 (4) | 100 | 98.9 | 0.72 | 2.2 (6) | 83.3 | 99.2 | 0.76 |

**Abbreviations:**CRHC, Care Register for Health Care; FPR, Finnish Prescription Register; PPA, positive percent agreement; NPA, negative percent agreement

**Notes:** ĸ = Kappa coefficient. PPA is the percentage of positive ratings in CRHC and survey out of all positive ratings in CRHC. NPA is the percentage of negative ratings in CRHC and survey out of all negative ratings in CRHC.
